# Supplementary material for: Pregnancy weight gain and breast cancer risk
Source: Springer Nature journal article supplement (doi:10.1186/1472-6874-4-7), 2004-10-21
Supplement: Additional file 1 [file 1472-6874-4-7-s1.doc]

*Appendix 1.* Calculation of Line A and Line B for each mother

Calculation of pregnancy weight gain is based on self-reported pre-pregnancy weight and weights measured at the first and the last maternity center visits and when the mother arrived at the hospital for delivery. Availability of the data from these measurements is shown below by breast cancer status (n, %).

|  | Pre-pregnancy weight,  n (%) | The first visit at 4-15 week, n (%) | The first visit at 15-24 week, n (%) | The last visit >30 week,  n (%) | At delivery  >30 week,  n (%) | Postpartum  51 days,  n (%) |
| --- | --- | --- | --- | --- | --- | --- |
| Cases (n=185) | 167 (90) | 81 (44) | 62 (34) | 141 (76) | 64 (35) | 97 (52) |
| Controls (n=3,024) | 2,711 (90) | 1,220 (40) | 1,057 (35) | 2,401 (79) | 1,014 (34) | 1,557 (51) |
| Total (n=3,209) | 2,878 (90) | 1,301 (41) | 1,119 (35) | 2,542 (79) | 1,078 (34) | 1,654 (52) |

The formula used to calculate the lines was:

and .

For Line A (0-15 gestation week), w1= mothers pre-pregnancy weight, w2= weight measured before 15th gestation week(or if that was not available, for 967 of 2,143 women (45.1%), abstracted from Line B at 15th gestation week), g1= gestation week for w1 (0) and g2= gestation week for w2 (mean 11.3 week).

For Line B (15-40 gestation weeks), w1= weight measured between 15-24th gestation week (or if that was not available, for 1,122 of 2,184 women (51.4%), abstracted from Line A at 15th gestation week), w2= weight measured after 30th gestation week, g1= gestation week for w1 (mean 18.2 week) and g2= gestation week for w2 (mean 39.1 week).

The total pregnancy weight gain for 0-40 gestation weeks (both Line A and Line B) could be extrapolated for 2,089 (65% of 3,209) of the women.

| Extrapolated average pregnancy weight gain (kg) in the cohort: the average Line A (n=2,143) for 0-15th and the average Line B (n=2,184) for 15-40th gestation weeks |
| --- |
